# Supplementary material
Source: Elsevier journal article supplement (https://www.sciencedirect.com/science/article/pii/S0212656718305407)
Supplement: mmc1 [file S0212656718305407:mmc1.docx]

APÉNDICE A. Categorización de variables

Causas de Errores de Medicación

- Error de identificación (del paciente)
- Error por uso de historia electrónica
- Prescripción inadecuada (incluye indicación y de dosis incorrectas, contraindicaciones, interacciones y alergias)
- Error de conciliación
- Prescripción de fármaco no disponible
- Fallo comunicación profesional-paciente
- Error de dispensación
- Error de administración
- Despiste de administración
- Error de monitorización/seguimiento
- Despiste del paciente

Categorización de la variable “daño real” (definición de las categorías según National Reporting and Learning Sistem del NHS32)

- Sin daño en el paciente: Incluye los errores de medicación que no alcanzan al paciente y los que le alcanzan pero no producen ningún daño
- Daño leve: Incluye los errores de medicación que requieren observación extra o tratamiento menor
- Daño moderado: Incluye los errores de medicación que causan daño de corta duración en el paciente que requiere tratamiento o procedimiento posterior
- Daño grave: Incluye los errores de medicación que causan daño de larga duración o permanentes en el paciente. También incluye muerte por error de medicación
